# Supplementary material for: The Changes of Amino-Acid Metabolism between Wheat and Rice during Early Growth under Flooding Stress
Source: MDPI journal article supplement (doi:10.3390/ijms25105229), 2024-05-11
Supplement: s1 [file s1]

Table S1. List of contents of amino acids in root of rice and wheat

|                 | rice (nmol/mL) |        |         |       | wheat (nmol/mL) |        |         |        |
|-----------------|----------------|--------|---------|-------|-----------------|--------|---------|--------|
|                 | control        |        | flood   |       | control         |        | flood   |        |
|                 | mean           | ± SD   | mean    | ± SD  | mean            | ± SD   | mean    | ± SD   |
| P-Ser           | 9.52           | 0.49   | 12.96   | 0.18  | 8.12            | 1.02   | 10.91   | 0.50   |
| PEA             | 0.00           | 0.00   | 30.15   | 0.71  | 0.00            | 0.00   | 58.59   | 1.85   |
| Asp             | 161.19         | 5.50   | 414.45  | 8.35  | 174.75          | 18.94  | 129.00  | 0.63   |
| Thr             | 35.89          | 0.39   | 89.49   | 6.87  | 83.44           | 11.76  | 189.28  | 6.34   |
| Ser             | 109.30         | 1.43   | 224.05  | 22.21 | 115.59          | 13.59  | 186.88  | 9.71   |
| Asn             | 28.31          | 0.00   | 82.19   | 17.45 | 525.75          | 133.52 | 1465.73 | 123.76 |
| Glu             | 202.72         | 62.41  | 436.12  | 26.29 | 305.14          | 25.55  | 610.62  | 47.92  |
| Gln             | 71.78          | 37.78  | 155.62  | 4.09  | 573.29          | 194.15 | 628.38  | 57.82  |
| Gly             | 20.43          | 24.76  | 123.61  | 42.42 | 77.29           | 34.79  | 146.18  | 2.18   |
| Ala             | 69.00          | 4.76   | 667.58  | 99.78 | 263.65          | 60.28  | 2816.53 | 197.49 |
| a-ABA           | 0.00           | 0.00   | 12.02   | 1.87  | 0.00            | 0.00   | 30.27   | 2.13   |
| Val             | 85.44          | 6.67   | 191.92  | 15.74 | 140.60          | 26.47  | 358.29  | 6.21   |
| Met             | 91.54          | 4.15   | 97.68   | 1.68  | 93.30           | 3.31   | 105.34  | 2.62   |
| Ile             | 74.00          | 8.59   | 137.35  | 12.52 | 128.17          | 22.91  | 281.43  | 6.09   |
| Leu             | 85.96          | 11.50  | 184.66  | 22.43 | 164.33          | 31.95  | 384.26  | 6.93   |
| Tyr             | 21.29          | 0.87   | 66.53   | 7.14  | 28.68           | 4.91   | 82.11   | 1.52   |
| Phe             | 14.90          | 1.11   | 54.45   | 6.24  | 19.45           | 3.04   | 73.76   | 1.24   |
| GABA            | 43.75          | 9.97   | 1191.41 | 91.33 | 73.66           | 10.75  | 1671.63 | 128.41 |
| MEA             | 0.00           | 0.00   | 70.10   | 23.39 | 0.00            | 0.00   | 0.00    | 0.00   |
| NH <sub>3</sub> | 343.37         | 135.66 | 507.34  | 62.85 | 387.68          | 69.54  | 316.77  | 34.85  |
| Orn             | 0.00           | 0.00   | 17.17   | 5.73  | 0.00            | 0.00   | 0.00    | 0.00   |
| 1M-His          | 0.00           | 0.00   | 57.93   | 5.71  | 0.00            | 0.00   | 90.45   | 3.55   |
| His             | 45.59          | 0.91   | 110.20  | 6.03  | 68.81           | 9.19   | 146.75  | 5.64   |
| Lys             | 28.94          | 1.42   | 121.67  | 11.70 | 19.71           | 5.37   | 131.15  | 7.96   |
| Arg             | 24.96          | 2.14   | 92.79   | 5.62  | 0.00            | 0.00   | 104.08  | 4.31   |
| Pro             | 53.91          | 3.76   | 108.25  | 22.68 | 84.40           | 19.38  | 351.72  | 31.21  |

The data are presented as mean ± S.D. from 3 independent biological replicates.
